# **Avian Influenza Virus Infections in Felines: A Systematic Review of Two Decades of Literature**

Kristen K. Coleman<sup>1,2</sup> and Ian G. Bemis<sup>1,2</sup>

1. Department of Global, Environmental, and Occupational Health, University of Maryland School of Public Health, College Park, MD, USA
2. Department of Veterinary Medicine, College of Agriculture and Natural Resources, University of Maryland, College Park, MD, USA

**Corresponding author:** Kristen K. Coleman, PhD, 4200 Valley Drive, College Park, MD, 20742, USA, Email: [kkcolema@umd.edu](mailto:kkcolema@umd.edu)

**Keywords:** avian influenza virus, cross-species transmission, zoonosis, felines, cats, avian influenza pandemic

**Running title:** Avian Influenza Virus in Felines

**Abstract:** As an avian influenza virus panzootic is underway, the threat of a human pandemic is emerging. Infections among mammalian species in frequent contact with humans should be closely monitored. One mammalian family, the Felidae, is of particular concern. Felids, known as felines or cats, are susceptible to avian influenza virus infection. Felines prey on wild birds and may serve as a host for avian influenza virus adaptation to mammals. Feline-to-feline transmission has been demonstrated experimentally [1], and real-world outbreaks have been reported [2,3]. Domestic cats are a popular human companion animal and thus provide a potential pathway for zoonotic spillover of avian influenza viruses to humans. Here, we provide a systematic review of the scientific literature to describe the epidemiology and global distribution of avian influenza virus infections in felines reported from 2004 – 2024. We aim to provide a comprehensive background for the assessment of the current risk, as well as bring awareness to the recurring phenomenon of AIV infection in felines.

## **Introduction**

Avian influenza virus (AIV) is an important and emerging zoonotic and reverse-zoonotic viral pathogen with pandemic potential. AIV has caused substantial disruptions to food supply chains, resulting in large economic losses in the poultry industry, as well as disruptions to regional and global food security. As avian influenza has a high mortality rate, an AIV pandemic could result in substantially more human illness and death than recent pandemics. While current attention is focused on AIV as an emerging pathogen in U.S. dairy cattle, infections among other susceptible domestic mammalian species have received comparatively little attention. In particular, AIV infections in free-roaming and farm-associated domestic cats in have recently been documented in the U.S. [4,5], but overall surveillance efforts among felines appear sparse.

Domestic cats are a popular human companion animal and thus provide a potential pathway for zoonotic spillover of avian influenza viruses to humans. Avian influenza in felines is often fatal, although subclinical infections have been reported [6]. Felines prey on wild birds and may serve as a host for avian influenza virus adaptation to mammals. Feline-to-feline transmission has been demonstrated experimentally [1], and real-world outbreaks have been reported [2,3]. To provide a comprehensive background for the assessment of the current risk, as well as to bring awareness to the phenomenon of AIV infection in felids, we performed a systematic review of AIV infections in felines reported in the peer-reviewed scientific literature from 2004 to 2024. In this review, we sought to characterize the epidemiology and global distribution of AIV infections in felid species of domestic and wild origin reported over time, including information on AIV subtypes and clades identified.

## **Methods**

### ***Electronic literature search and article selection***

We conducted systematic electronic searches for peer-reviewed articles in the English

scientific literature to identify eligible studies. Our search strategy is presented in Supplementary Table 1. A study was eligible to be included if the following criteria were met: (1) avian influenza virus infection (including the abbreviation AIV) in “felines”, “felids”, or “cats” mentioned in the abstract, main text, or within keywords, including Pantherinae species names (i.e., lion, tiger, jaguar, leopard, snow leopard) and Felinae species names (e.g., cheetah, caracal, cat, wildcat, jaguarundi, ocelot, oncilla, tigrillo, kodkod, güiña, margay, southern tigrina, serval, lynx, bobcat, manul, cougar, puma, and catamount), and (2) surveillance/epidemiological studies, case reports, or laboratory/bioinformatics studies of animal samples (or data from animal samples) that report original/primary evidence of avian influenza virus detection in felines/cats within the abstract or main text. We excluded studies where: (1) sound detection methods for the identification of avian influenza virus were not used, (2) original/primary evidence of avian influenza virus detection was not reported (e.g., genomic studies of avian influenza virus specimens already reported in the peer-reviewed literature), and (3) publication was after May 2024. Note that genomic studies of previously collected avian influenza virus specimens were included if the specimens were not reported elsewhere in the peer-reviewed scientific literature. Studies selected for inclusion are listed in Table 1.

### ***Data extraction and statistical analysis***

Data such as number of avian influenza virus infections, location, intra- or cross-species transmission, disease characteristics, outcomes, and species infected were extracted from full-text articles using a data collection form. Data were imported to STATA version 15.1 (StataCorp, College Station, TX, USA) for analysis.

### **Results**

Our electronic search generated 185 articles through PubMed and 175 through Scopus. We identified a total of 17 experimental infection studies [1,7–22] and excluded them from

our review. After further screening, we included a total of 41 articles in our review (Table 1), two of which were identified manually, including one [23] through article references and one early release publication [5]. See Figure 1 for a PRISMA consort diagram of article screening and selection.

### ***Avian influenza virus infections in felines reported over time***

The annual number of articles reporting avian influenza infections in felines drastically increased in 2023 (Figure 2), with a recent spike in the total number of domestic cat infections reported in 2023 and 2024 (Figure 3) from multiple regions (Supplementary Figure 1). This spike is commensurate with the emergence and increased spread of avian influenza virus H5N1 clade 2.3.4.4b among birds and mammals. As publication year may not be representative of the actual year(s) in which reported feline infections occurred, we provide data on the specific year(s) each study took place (Table 1).

The overall case fatality rate among the reported RT-PCR-confirmed feline infections identified in our review was estimated to be 63%. Among the publications that described the illness experienced by the reported feline infections, respiratory and neurological illness were the most common and often resulted in death. Blindness and chorioretinitis were also recently observed in two AIV-infected domestic cats exposed to the virus through drinking raw colostrum and milk containing high viral loads from infected dairy cattle [5]. This clinical observation was unique to these feline cases and suggests that exposure route and dose of AIV might impact disease presentation and severity.

Among all the reported feline infections, highly pathogenic avian influenza A(H5N1) was the most frequently identified subtype, followed by H5N6, H7N2, H9N2, and H3N8. H5N1 clade 2.3.4.4b was first detected in felines in 2022, including a wild lynx during an outbreak among pheasants in Finland [24], and a domestic cat living near a duck farm in France [25]. All studies reporting feline infections occurring since that time have identified H5N1 clade

2.3.4.4b as the causative agent [4,26–32], aside from one serology study in Spain which did not report the specific clade of the H5 virus identified [33]. Overall, clade 2.3.4.4b accounted for 112 of the reported feline cases and 75 deaths, yielding a mortality rate of 67%.

#### ***Distribution of avian influenza virus infections in felines***

From 2004 – 2024, approximately 486 avian influenza virus infections in felines, including 249 associated feline deaths, were reported in the English scientific literature (Supplementary Figures 2 and 3). In total, 89 of these infections were identified through serological studies, while the rest were identified by RT-PCR or viral culture followed by genome sequencing. Infections among 10 felid species (Supplementary Figure 4) across 7 geographical regions of the world (Supplementary Figure 5) were reported. The majority of reports (54%) were from Asia (including Southeast Asia), followed by Europe (24%) and North America (12%) (Figure 4). We provide a summary of the geographical distribution of reported avian influenza virus infections in felines in Table 1 and Figure 5.

Feline infections of H5N1 clade 2.3.4.4b were reported in Finland, France, Poland, USA, Italy, Peru, and South Korea [4,5,24–32], including 5 species (107 domestic cats, two bobcats, and one lynx, caracal, and lion). Zoos, animal shelters, and rural settings such as farms and private land were the most common settings where AIV infections in felines were reported to occur.

#### ***Cross- and intra-species transmission of avian influenza virus in felines***

Most of the reported AIV infections in felines were confirmed or suspected to be a result of bird-to-feline transmission. Eating dead pigeons, chickens, and other birds, as well as contaminated raw chicken feed, was often implicated. However, two domestic farm cats were reported to have been fed raw colostrum and milk from AIV-infected dairy cattle in Texas [5], which demonstrates a potential new route of cross-species, mammal-to-mammal transmission. A total of three studies reported probable intra-species (feline-to-feline)

transmission of avian influenza virus, including tiger-to-tiger [2] and domestic cat-to-cat [3,32] transmission. Feline-to-human transmission of AIV has also been documented [2,3]. The first study to report feline-to-human transmission involved an outbreak of H5N1 among zoo tigers in Thailand, after which two humans showed evidence of seroconversion [2]. The second study involved a large outbreak of H7N2 among domestic cats in an animal shelter in New York, where two humans were infected, including a visiting veterinarian who collected samples from infected cats [3], and an animal shelter worker exposed to the infected cats [34].

### **Discussion and Conclusion**

Through our systematic review, we identified 486 avian influenza virus infections in felines, including 249 associated feline deaths, reported in the English scientific literature from 2004 – 2024. The reports represent cases from 7 geographical regions, including 17 countries and 12 felid species. Of particular interest are domestic cats infected with H5N1 clade 2.3.4.4, which represents a variant in the hemagglutinin serotype 5 gene of IAV which became the dominant IAV H5 serotype among poultry in 2020 [35]. Clade 2.3.4.4b was first reported in felines in 2022, and among the feline infections reported, it has yielded a mortality rate of 67%. Clade 2.3.4.4b is also responsible for the ongoing AIV outbreaks among dairy cattle in the U.S. [5], representing a significant threat to feline companion animals. Furthermore, subclinical infections of H5N1 in cats have been reported [6]. Thus, we argue that surveillance among domestic cats is urgently needed. As feline-to-human transmission of AIV has been documented [2,3], farm cat owners, veterinarians, zoo keepers, and cat shelter volunteers may have a heightened risk of AIV infection during outbreaks among poultry and mammalian farm animals.

### **Conflict of Interest**

All authors declare that they have no conflicts of interest.

### **Funding and Acknowledgments**

We acknowledge the support of the University of Maryland Baltimore, Institute for Clinical & Translational Research (ICTR) and the University of Maryland Strategic Partnership: *MPowering the State* (MPower). This work was inspired by Dr. Kristen K. Coleman's kitten, Tuna.

## References

1. Kuiken T, Rimmelzwaan G, van Riel D, et al. Avian H5N1 influenza in cats. *Science* **2004**; 306:241.
2. Thanawongnuwech R, Amonsin A, Tantilertcharoen R, et al. Probable tiger-to-tiger transmission of avian influenza H5N1. *Emerg Infect Dis* **2005**; 11:699–701.
3. Lee CT, Slavinski S, Schiff C, et al. Outbreak of Influenza A(H7N2) Among Cats in an Animal Shelter With Cat-to-Human Transmission-New York City, 2016. *Clin Infect Dis* **2017**; 65:1927–1929.
4. Sillman SJ, Drozd M, Loy D, Harris SP. Naturally occurring highly pathogenic avian influenza virus H5N1 clade 2.3.4.4b infection in three domestic cats in North America during 2023. *J Comp Pathol* **2023**; 205:17–23.
5. Burrough ER, Magstadt DR, Petersen B, et al. Early Release - Highly Pathogenic Avian Influenza A(H5N1) Clade 2.3.4.4b Virus Infection in Domestic Dairy Cattle and Cats, United States, 2024 - Volume 30, Number 7—July 2024 - *Emerging Infectious Diseases journal - CDC*. Available at: [https://wwwnc.cdc.gov/eid/article/30/7/24-0508\\_article](https://wwwnc.cdc.gov/eid/article/30/7/24-0508_article). Accessed 30 April 2024.
6. Leschnik M, Weikel J, Möstl K, et al. Subclinical Infection with Avian Influenza A H5N1 Virus in Cats - Volume 13, Number 2—February 2007 - *Emerging Infectious Diseases journal - CDC*. Available at: [https://wwwnc.cdc.gov/eid/article/13/2/06-0608\\_article](https://wwwnc.cdc.gov/eid/article/13/2/06-0608_article). Accessed 27 April 2024.
7. Hinshaw VS, Webster RG, Easterday BC, Bean WJ. Replication of avian influenza A viruses in mammals. *Infect Immun* **1981**; 34:354–361.
8. Rimmelzwaan GF, van Riel D, Baars M, et al. Influenza A virus (H5N1) infection in cats causes systemic disease with potential novel routes of virus spread within and between hosts. *Am J Pathol* **2006**; 168:176–183; quiz 364.
9. van Riel D, Munster VJ, de Wit E, et al. H5N1 Virus Attachment to Lower Respiratory Tract. *Science* **2006**; 312:399.
10. Chang S, Ding Z, Yang S-T, et al. [Study on the histopathology of cats inoculated with H5N1 subtype high pathogenic avian influenza virus originated from tigers]. *Bing Du Xue Bao* **2007**; 23:477–480.
11. Giese M, Harder TC, Teifke JP, et al. Experimental infection and natural contact exposure of dogs with avian influenza virus (H5N1). *Emerg Infect Dis* **2008**; 14:308–310.
12. Vahlenkamp TW, Harder TC, Giese M, et al. Protection of cats against lethal influenza H5N1 challenge infection. *J Gen Virol* **2008**; 89:968–974.
13. Marschall J, Schulz B, Hartmann K. Evaluation of a point-of-care influenza antigen test for the detection of highly pathogenic avian influenza H5N1 virus in cats. *Transbound Emerg Dis* **2008**; 55:315–317.



14. van Riel D, Rimmelzwaan GF, van Amerongen G, Osterhaus ADME, Kuiken T. Highly pathogenic avian influenza virus H7N7 isolated from a fatal human case causes respiratory disease in cats but does not spread systemically. *Am J Pathol* **2010**; 177:2185–2190.
15. Vahlenkamp TW, Teifke JP, Harder TC, Beer M, Mettenleiter TC. Systemic influenza virus H5N1 infection in cats after gastrointestinal exposure. *Influenza Other Respir Viruses* **2010**; 4:379–386.
16. Reperant LA, van de Bildt MWG, van Amerongen G, et al. Marked endotheliotropism of highly pathogenic avian influenza virus H5N1 following intestinal inoculation in cats. *J Virol* **2012**; 86:1158–1165.
17. Driskell EA, Jones CA, Berghaus RD, Stallknecht DE, Howerth EW, Tompkins SM. Domestic cats are susceptible to infection with low pathogenic avian influenza viruses from shorebirds. *Vet Pathol* **2013**; 50:39–45.
18. Zhang K, Zhang Z, Yu Z, et al. Domestic cats and dogs are susceptible to H9N2 avian influenza virus. *Virus Res* **2013**; 175:52–57.
19. Kim Y-I, Pascua PNQ, Kwon H-I, et al. Pathobiological features of a novel, highly pathogenic avian influenza A(H5N8) virus. *Emerg Microbes Infect* **2014**; 3:e75.
20. Tabynov K, Sansyrbay A, Sandybayev N, Mambetaliyev M. The pathogenicity of swan derived H5N1 virus in birds and mammals and its gene analysis. *Virol J* **2014**; 11:207.
21. Kim HM, Park EH, Yum J, Kim HS, Seo SH. Greater virulence of highly pathogenic H5N1 influenza virus in cats than in dogs. *Arch Virol* **2015**; 160:305–313.
22. Wang L, Fu X, Zheng Y, et al. The NS1 protein of H5N6 feline influenza virus inhibits feline beta interferon response by preventing NF- $\kappa$ B and IRF3 activation. *Dev Comp Immunol* **2017**; 74:60–68.
23. Soilemetzidou E-S, De Bruin E, Franz M, et al. Diet May Drive Influenza A Virus Exposure in African Mammals. *The Journal of Infectious Diseases* **2020**; 221:175–182.
24. Tammiranta N, Isomursu M, Fusaro A, et al. Highly pathogenic avian influenza A (H5N1) virus infections in wild carnivores connected to mass mortalities of pheasants in Finland. *Infect Genet Evol* **2023**; 111:105423.
25. Briand F-X, Souchaud F, Pierre I, et al. Highly Pathogenic Avian Influenza A(H5N1) Clade 2.3.4.4b Virus in Domestic Cat, France, 2022. *Emerg Infect Dis* **2023**; 29:1696–1698.
26. Rabalski L, Milewska A, Pohlmann A, et al. Emergence and potential transmission route of avian influenza A (H5N1) virus in domestic cats in Poland, June 2023. *Euro Surveill* **2023**; 28:2300390.
27. Domańska-Blicharz K, Świętoń E, Świątalska A, et al. Outbreak of highly pathogenic avian influenza A(H5N1) clade 2.3.4.4b virus in cats, Poland, June to July 2023. *Euro Surveill* **2023**; 28:2300366.

28. Moreno A, Bonfante F, Bortolami A, et al. Asymptomatic infection with clade 2.3.4.4b highly pathogenic avian influenza A(H5N1) in carnivore pets, Italy, April 2023. *Euro Surveill* **2023**; 28:2300441.
29. Szaluś-Jordanow O, Golke A, Dzieciatkowski T, et al. A Fatal A/H5N1 Avian Influenza Virus Infection in a Cat in Poland. *Microorganisms* **2023**; 11:2263.
30. Elsmo EJ, Wünschmann A, Beckmen KB, et al. Highly Pathogenic Avian Influenza A(H5N1) Virus Clade 2.3.4.4b Infections in Wild Terrestrial Mammals, United States, 2022. *Emerg Infect Dis* **2023**; 29:2451–2460.
31. Cruz CD, Icochea ME, Espejo V, et al. Highly Pathogenic Avian Influenza A(H5N1) from Wild Birds, Poultry, and Mammals, Peru. *Emerg Infect Dis* **2023**; 29:2572–2576.
32. Lee K, Yeom M, Vu TTH, et al. Characterization of highly pathogenic avian influenza A (H5N1) viruses isolated from cats in South Korea, 2023. *Emerg Microbes Infect* **2024**; 13:2290835.
33. Villanueva-Saz S, Martínez M, Rueda P, et al. Serological exposure to influenza A in cats from an area with wild birds positive for avian influenza. *Zoonoses Public Health* **2024**; 71:324–330.
34. Poirot E, Levine MZ, Russell K, et al. Detection of Avian Influenza A(H7N2) Virus Infection Among Animal Shelter Workers Using a Novel Serological Approach-New York City, 2016–2017. *J Infect Dis* **2019**; 219:1688–1696.
35. Cui P, Shi J, Wang C, et al. Global dissemination of H5N1 influenza viruses bearing the clade 2.3.4.4b HA gene and biologic analysis of the ones detected in China. *Emerging Microbes & Infections* **2022**; 11:1693–1704.
36. Keawcharoen J, Oraveerakul K, Kuiken T, et al. Avian influenza H5N1 in tigers and leopards. *Emerg Infect Dis* **2004**; 10:2189–2191.
37. Team E editorial. Further spread of avian influenza in Europe, detection in French farmed birds and German cat. *Weekly releases (1997–2007)* **2006**; 11:2911.
38. Songserm T, Amonsin A, Jam-on R, et al. Avian Influenza H5N1 in Naturally Infected Domestic Cat - Volume 12, Number 4—April 2006 - *Emerging Infectious Diseases journal - CDC*. Available at: [https://wwwnc.cdc.gov/eid/article/12/4/05-1396\\_article](https://wwwnc.cdc.gov/eid/article/12/4/05-1396_article). Accessed 27 April 2024.
39. Yingst SL, Saad MD, Felt SA. Qinghai-like H5N1 from Domestic Cats, Northern Iraq - Volume 12, Number 8—August 2006 - *Emerging Infectious Diseases journal - CDC*. Available at: [https://wwwnc.cdc.gov/eid/article/12/8/06-0264\\_article](https://wwwnc.cdc.gov/eid/article/12/8/06-0264_article). Accessed 27 April 2024.
40. Klopfleisch R, Wolf PU, Uhl W, et al. Distribution of lesions and antigen of highly pathogenic avian influenza virus A/Swan/Germany/R65/06 (H5N1) in domestic cats after presumptive infection by wild birds. *Vet Pathol* **2007**; 44:261–268.

41. Mushtaq MH, Juan H, Jiang P, et al. Complete genome analysis of a highly pathogenic H5N1 influenza A virus isolated from a tiger in China. *Arch Virol* **2008**; 153:1569–1574.
42. Lam TT-Y, Hon C-C, Pybus OG, et al. Evolutionary and transmission dynamics of reassortant H5N1 influenza virus in Indonesia. *PLoS Pathog* **2008**; 4:e1000130.
43. Desvaux S, Marx N, Ong S, et al. Highly pathogenic avian influenza virus (H5N1) outbreak in captive wild birds and cats, Cambodia. *Emerg Infect Dis* **2009**; 15:475–478.
44. El-Sayed A, Prince A, Fawzy A, et al. Sero-prevalence of avian influenza in animals and human in Egypt. *Pak J Biol Sci* **2013**; 16:524–529.
45. He S, Shi J, Qi X, Huang G, Chen H, Lu C. Lethal infection by a novel reassortant H5N1 avian influenza A virus in a zoo-housed tiger. *Microbes Infect* **2015**; 17:54–61.
46. Zhou H, He S, Sun L, et al. Serological evidence of avian influenza virus and canine influenza virus infections among stray cats in live poultry markets, China. *Vet Microbiol* **2015**; 175:369–373.
47. Sun L, Zhou P, He S, et al. Sparse serological evidence of H5N1 avian influenza virus infections in domestic cats, northeastern China. *Microb Pathog* **2015**; 82:27–30.
48. Yu Z, Gao X, Wang T, et al. Fatal H5N6 Avian Influenza Virus Infection in a Domestic Cat and Wild Birds in China. *Sci Rep* **2015**; 5:10704.
49. Zhao F-R, Zhou D-H, Zhang Y-G, et al. Detection prevalence of H5N1 avian influenza virus among stray cats in eastern China. *J Med Virol* **2015**; 87:1436–1440.
50. Hu T, Zhao H, Zhang Y, et al. Fatal influenza A (H5N1) virus Infection in zoo-housed Tigers in Yunnan Province, China. *Sci Rep* **2016**; 6:25845.
51. Chen Q, Wang H, Zhao L, et al. First documented case of avian influenza (H5N1) virus infection in a lion. *Emerg Microbes Infect* **2016**; 5:e125.
52. Newbury SP, Cigel F, Killian ML, et al. First Detection of Avian Lineage H7N2 in *Felis catus*. *Genome Announc* **2017**; 5:e00457-17.
53. Cao X, Yang F, Wu H, Xu L. Genetic characterization of novel reassortant H5N6-subtype influenza viruses isolated from cats in eastern China. *Arch Virol* **2017**; 162:3501–3505.
54. Kim HK, Kim H-J, Noh JY, et al. Serological evidence of H5-subtype influenza A virus infection in indigenous avian and mammalian species in Korea. *Arch Virol* **2018**; 163:649–657.
55. Wang K, Wang H, Feng N, et al. Serological surveillance of avian influenza virus and canine distemper virus in captive Siberian Tigers in Northeastern China. *Pol J Vet Sci* **2018**; 21:491–495.
56. Lee K, Lee E-K, Lee H, et al. Highly Pathogenic Avian Influenza A(H5N6) in Domestic Cats, South Korea. *Emerg Infect Dis* **2018**; 24:2343–2347.

57. Sangkachai N, Thongdee M, Chaiwattananarungruengpaisan S, et al. Serological evidence of influenza virus infection in captive wild felids, Thailand. *J Vet Med Sci* **2019**; 81:1341–1347.
58. Zhao J, He W, Lu M, He H, Lai A. Emergence and Characterization of a Novel Reassortant Canine Influenza Virus Isolated from Cats. *Pathogens* **2021**; 10:1320.
59. Bao P, Liu Y, Zhang X, et al. Human infection with a reassortment avian influenza A H3N8 virus: an epidemiological investigation study. *Nat Commun* **2022**; 13:6817.
60. Yang J, Yan J, Zhang C, et al. Genetic, biological and epidemiological study on a cluster of H9N2 avian influenza virus infections among chickens, a pet cat, and humans at a backyard farm in Guangxi, China. *Emerg Microbes Infect* **2023**; 12:2143282.

Table 1. Publications included in our systematic review of avian influenza virus infections in felines published from 2004-2024, including geographic region, country, species, and year(s) of study

| Reference                            | Year published | Region               | Country     | Species                                                                                                                                                 | Year(s) of study |
|--------------------------------------|----------------|----------------------|-------------|---------------------------------------------------------------------------------------------------------------------------------------------------------|------------------|
| Keawcharoen <i>et al.</i> [36]       | 2004           | Southeast Asia       | Thailand    | Tiger ( <i>Panthera tigris</i> ) & leopard ( <i>P. pardus</i> )                                                                                         | 2003             |
| Thanawongnuwech <i>et al.</i> [2]    | 2005           | Southeast Asia       | Thailand    | Tiger ( <i>P. tigris</i> )                                                                                                                              | 2004             |
| Editorial Team [37]                  | 2006           | Europe               | Germany     | Domestic cat ( <i>Felis catus</i> )                                                                                                                     | 2006             |
| Songserm <i>et al.</i> [38]          | 2006           | Southeast Asia       | Thailand    | Domestic cat ( <i>F. catus</i> )                                                                                                                        | 2004             |
| Yingst <i>et al.</i> [39]            | 2006           | Middle East / Africa | Iraq        | Domestic cat ( <i>F. catus</i> )                                                                                                                        | 2006             |
| Leschnik <i>et al.</i> [6]           | 2007           | Europe               | Austria     | Domestic cat ( <i>F. catus</i> )                                                                                                                        | 2006             |
| Klopfleisch <i>et al.</i> [40]       | 2007           | Europe               | Germany     | Domestic cat ( <i>F. catus</i> )                                                                                                                        | 2006             |
| Mushtaq <i>et al.</i> [41]           | 2008           | Asia                 | China       | Tiger ( <i>P. tigris</i> )                                                                                                                              | 2005             |
| Lam <i>et al.</i> [42]               | 2008           | Southeast Asia       | Indonesia   | Domestic cat ( <i>F. catus</i> )                                                                                                                        | 2005-2007        |
| Desvaux <i>et al.</i> [43]           | 2009           | Southeast Asia       | Cambodia    | Tiger ( <i>P. tigris</i> ), Asian golden cat ( <i>Catopuma temminckii</i> ), leopard ( <i>P. pardus</i> ), clouded leopard ( <i>Neofelis nebulosa</i> ) | 2004             |
| El-Sayed <i>et al.</i> [44]          | 2013           | Middle East / Africa | Egypt       | Domestic cat ( <i>F. catus</i> )                                                                                                                        | 2012?            |
| He <i>et al.</i> [45]                | 2015           | Asia                 | China       | Bengal tiger ( <i>P. tigris tigris</i> )                                                                                                                | 2013             |
| Zhou <i>et al.</i> [46]              | 2015           | Asia                 | China       | Domestic cat ( <i>F. catus</i> )                                                                                                                        | 2010-2012        |
| Sun <i>et al.</i> [47]               | 2015           | Asia                 | China       | Domestic cat ( <i>F. catus</i> )                                                                                                                        | 2013             |
| Yu <i>et al.</i> [48]                | 2015           | Asia                 | China       | Domestic cat ( <i>F. catus</i> )                                                                                                                        | 2014             |
| Zhao <i>et al.</i> [49]              | 2015           | Asia                 | China       | Domestic cat ( <i>F. catus</i> )                                                                                                                        | 2014?            |
| Hu <i>et al.</i> [50]                | 2016           | Asia                 | China       | Tiger ( <i>P. tigris</i> )                                                                                                                              | 2014 and 2015    |
| Chen <i>et al.</i> [51]              | 2016           | Asia                 | China       | Lion ( <i>P. leo</i> )                                                                                                                                  | 2016             |
| Newbury <i>et al.</i> [52]           | 2017           | North America        | USA         | Domestic cat ( <i>F. catus</i> )                                                                                                                        | 2016             |
| Cao <i>et al.</i> [53]               | 2017           | Asia                 | China       | Domestic cat ( <i>F. catus</i> )                                                                                                                        | 2016             |
| Lee <i>et al.</i> [3]                | 2017           | North America        | USA         | Domestic cat ( <i>F. catus</i> )                                                                                                                        | 2016             |
| Kim <i>et al.</i> [54]               | 2018           | Asia                 | Korea       | Leopard cat ( <i>Prionailurus bengalensis</i> )                                                                                                         | 2011-2016        |
| Wang <i>et al.</i> [55]              | 2018           | Asia                 | China       | Siberian tiger ( <i>P. tigris altaica</i> )                                                                                                             | 2015-2016        |
| Lee <i>et al.</i> [56]               | 2018           | Asia                 | South Korea | Domestic cat ( <i>F. catus</i> )                                                                                                                        | 2016             |
| Sangkachai <i>et al.</i> [57]        | 2019           | Southeast Asia       | Thailand    | Bengal tiger ( <i>P. tigris tigris</i> )                                                                                                                | 2012 and 2013    |
| Soilemetzidou <i>et al.</i> [23]     | 2020           | Africa               | Namibia     | Caracal ( <i>Caracal caracal</i> )                                                                                                                      | 2009-2013        |
| Zhao <i>et al.</i> [58]              | 2021           | Asia                 | China       | Domestic cat ( <i>F. catus</i> )                                                                                                                        | 2017             |
| Bao <i>et al.</i> [59]               | 2022           | Asia                 | China       | Domestic cat ( <i>F. catus</i> )                                                                                                                        | 2022             |
| Tammiranta <i>et al.</i> [24]        | 2023           | Europe               | Finland     | Lynx ( <i>Lynx lynx</i> )                                                                                                                               | 2022             |
| Briand <i>et al.</i> [25]            | 2023           | Europe               | France      | Domestic cat ( <i>F. catus</i> )                                                                                                                        | 2022             |
| Rabalski <i>et al.</i> [26]          | 2023           | Europe               | Poland      | Domestic cat ( <i>F. catus</i> ) & caracal ( <i>C. caracal</i> )                                                                                        | 2023             |
| Domańska-Blicharz <i>et al.</i> [27] | 2023           | Europe               | Poland      | Domestic cat ( <i>F. catus</i> )                                                                                                                        | 2023             |
| Sillman <i>et al.</i> [4]            | 2023           | North America        | USA         | Domestic cat ( <i>F. catus</i> )                                                                                                                        | 2023             |
| Moreno <i>et al.</i> [28]            | 2023           | Europe               | Italy       | Domestic cat ( <i>F. catus</i> )                                                                                                                        | 2023             |
| Szaluś-Jordanow <i>et al.</i> [29]   | 2023           | Europe               | Poland      | Domestic cat ( <i>F. catus</i> )                                                                                                                        | 2023             |
| Yang <i>et al.</i> [60]              | 2023           | Asia                 | China       | Domestic cat ( <i>F. catus</i> )                                                                                                                        | 2018             |
| Elsmo <i>et al.</i> [30]             | 2023           | North America        | USA         | Bobcat ( <i>Lynx rufus</i> )                                                                                                                            | 2022             |
| Cruz <i>et al.</i> [31]              | 2023           | South America        | Peru        | Lion ( <i>P. leo</i> )                                                                                                                                  | 2023             |
| Villanueva-Saz <i>et al.</i> [33]    | 2024           | Europe               | Spain       | Domestic cat ( <i>F. catus</i> )                                                                                                                        | 2022-2023        |
| Lee <i>et al.</i> [32]               | 2024           | Asia                 | South Korea | Domestic cat ( <i>F. catus</i> )                                                                                                                        | 2023             |
| Burrough <i>et al.</i> [5]           | 2024           | North America        | USA         | Domestic cat ( <i>F. catus</i> )                                                                                                                        | 2024             |

## Figures

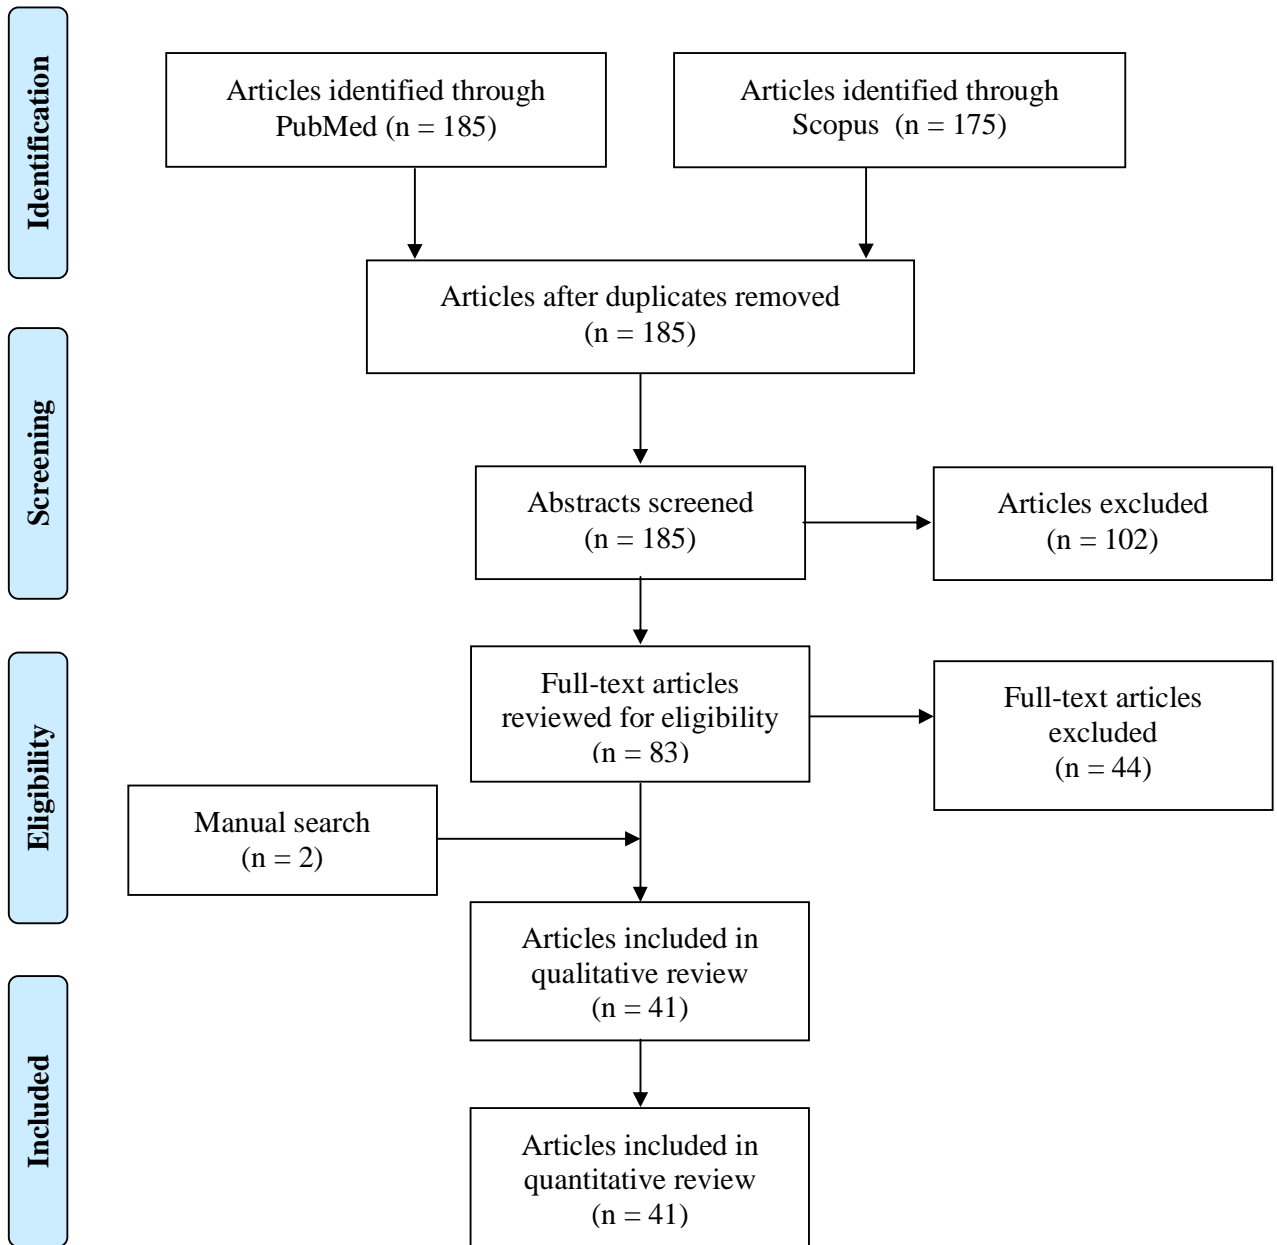

Figure 1. Identification, screening, and review of the scientific literature on avian influenza virus infections in felines published from 2004-2024

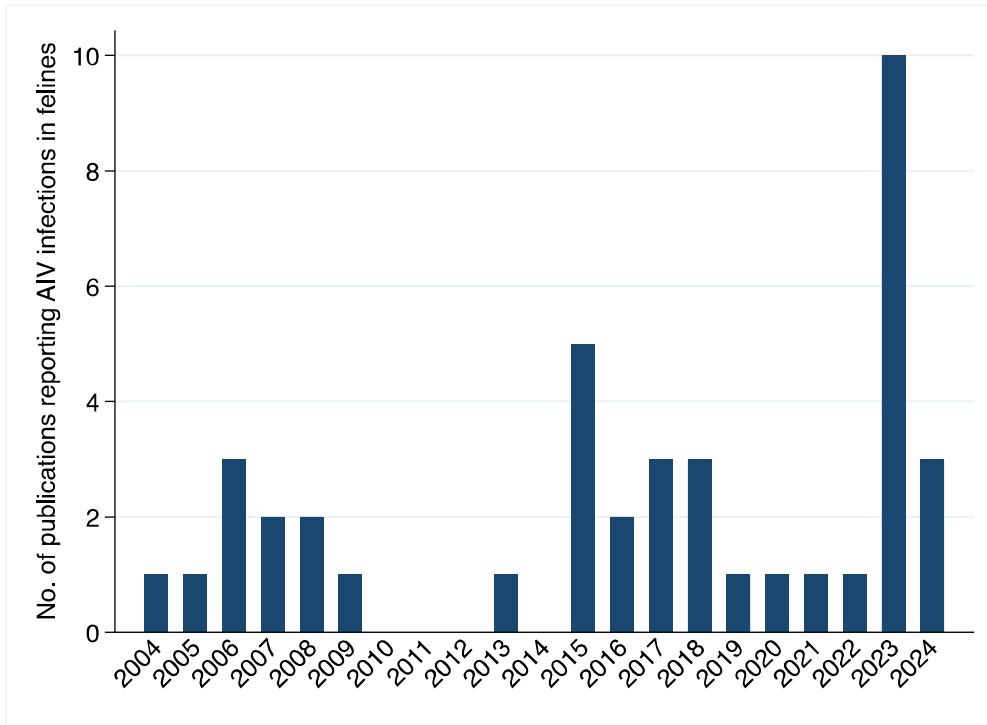

Figure 2. Number of peer-reviewed publications reporting avian influenza virus (AIV) infections in felines, each year from 2004-2024. The year 2024 represents articles (n=3) published in print or online from January through April 2024.

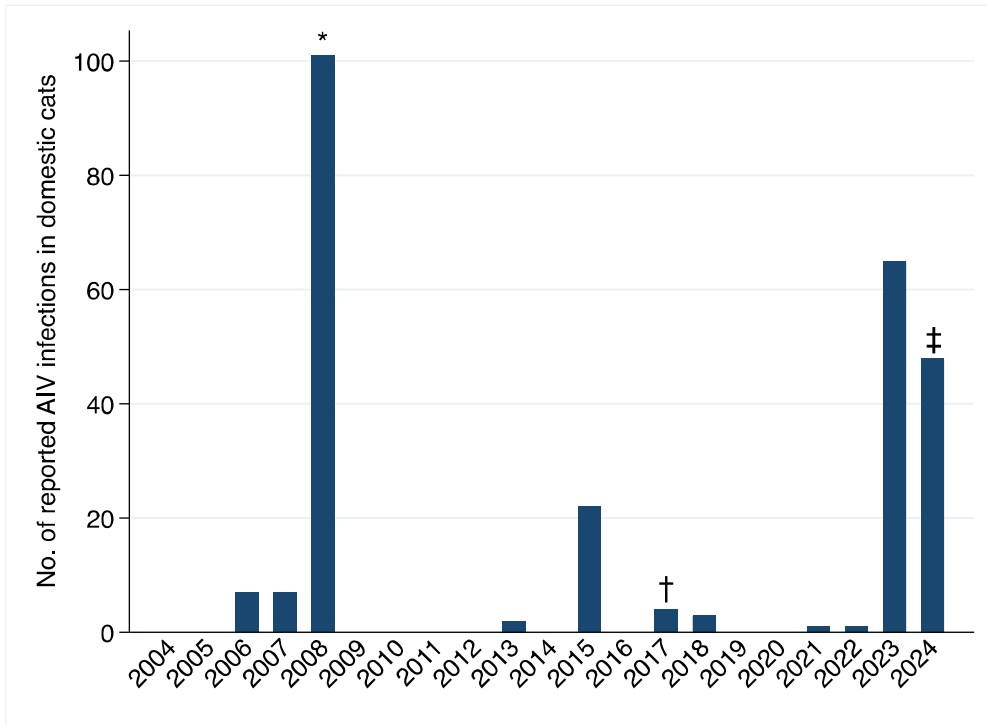

Figure 3. Number of avian influenza virus (AIV) infections in domestic cats reported each year in the peer-reviewed literature, 2004 – 2024. The year published may not be representative of the year in which each of the reported AIV infections occurred. \*Approximately 100 of 500 domestic cats sampled in Indonesia were reported to be seropositive for H5N1 (the cited official reports of these tests are difficult to find). †Outbreaks of H7N2 among domestic cats occurred in several U.S. animal shelters in December 2016 but data published in the peer-reviewed literature in 2017 do not include the number of infections and thus they are not included in this figure. ‡The year 2024 represents articles (n=3) published in print or online from January through April 2024.



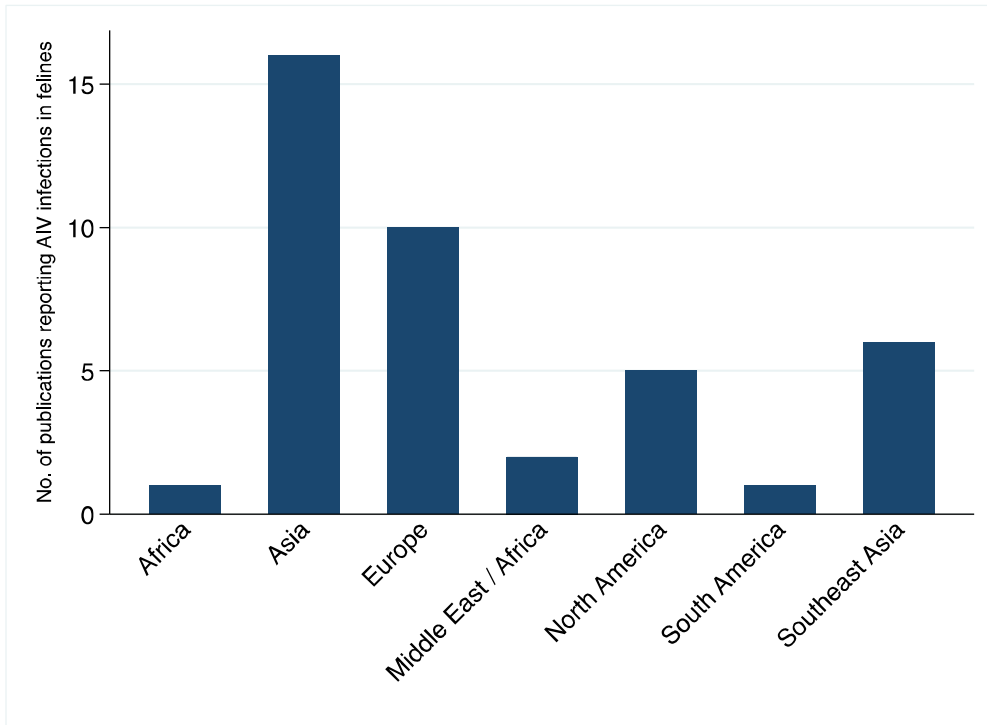

Figure 4. Number of peer-reviewed publications reporting avian influenza virus (AIV) infections in felines, by geographic region of the world, 2004 – 2024

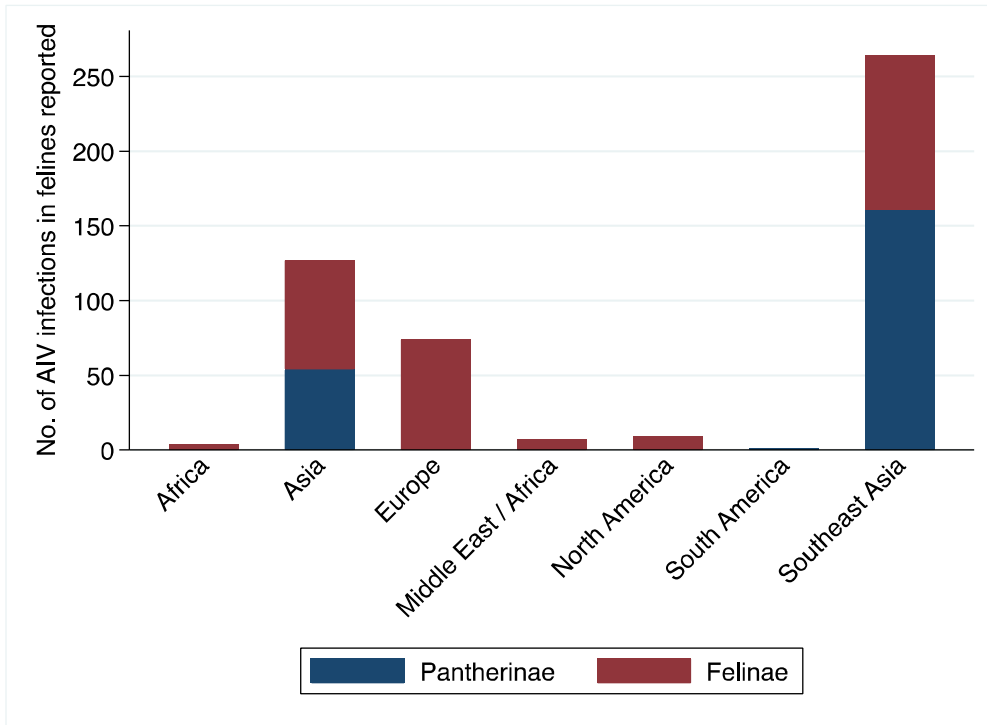

Figure 5. Geographical distribution of reported avian influenza virus (AIV) infections in felines, 2004
